# Supplementary material for: Microfluidic fabrication of X-ray-visible sodium hyaluronate microspheres for embolization
Source: Royal Society of Chemistry journal article supplement (doi:10.1039/d3ra02812g), 2023-01-01
Supplement: d3ra02812g1.pdf [file d3ra02812g1.pdf]

## *Supporting Information*

### **Microfluidic fabrication of X-ray-visible sodium hyaluronate microspheres for embolization**

Yang Shen,<sup>ab</sup> Baoqu Zhang,<sup>ab</sup> Zihan Yi,<sup>ab</sup> Lan Zhang,<sup>ab</sup> Jing Ling,<sup>ab</sup> Shibo Wang,<sup>ab</sup>  
Zhichao Sun,<sup>\*c</sup> M. Zubair Iqbal<sup>ab</sup> and Xiangdong Kong<sup>\*ab</sup>

<sup>a</sup> Institute of Smart Biomaterial Materials, School of Materials Science and Engineering,  
Zhejiang Sci-Tech University, Hangzhou 310018, P. R. China

<sup>b</sup> Zhejiang-Mauritius Joint Research Center for Biomaterials and Tissue Engineering,  
Zhejiang Sci-Tech University, Hangzhou 310018, P. R. China

<sup>c</sup> The Department of Medical Imaging, The First Medical College of Zhejiang  
Chinese Medical University, Hangzhou 310053, China.

#### **Corresponding Author**

\*E-mail address: kongxd@zstu.ecu.cn (Xiangdong Kong)

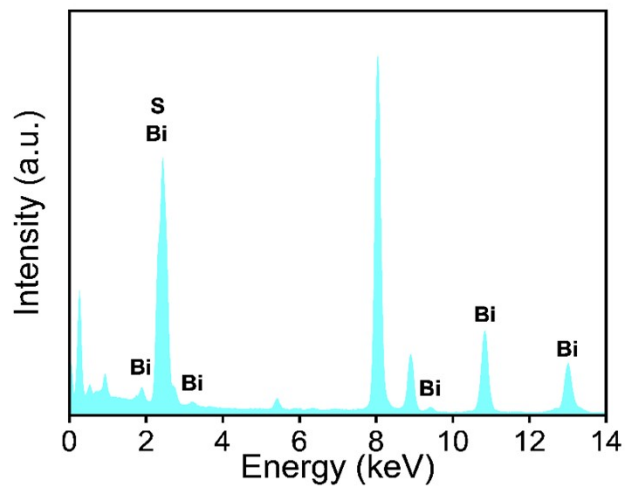

**Fig. S1** The EDS spectrum of  $\text{Bi}_2\text{S}_3$  NRs.

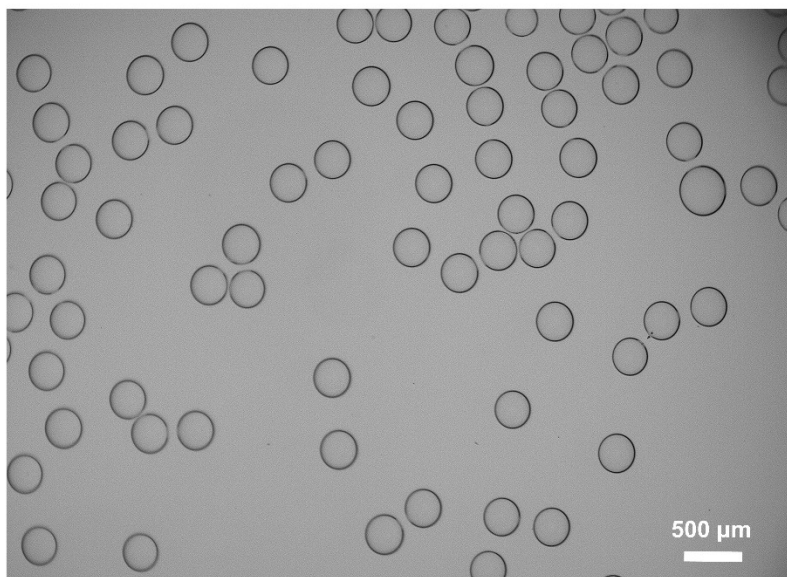

**Fig. S2** Optical micrograph of SH microdroplets.

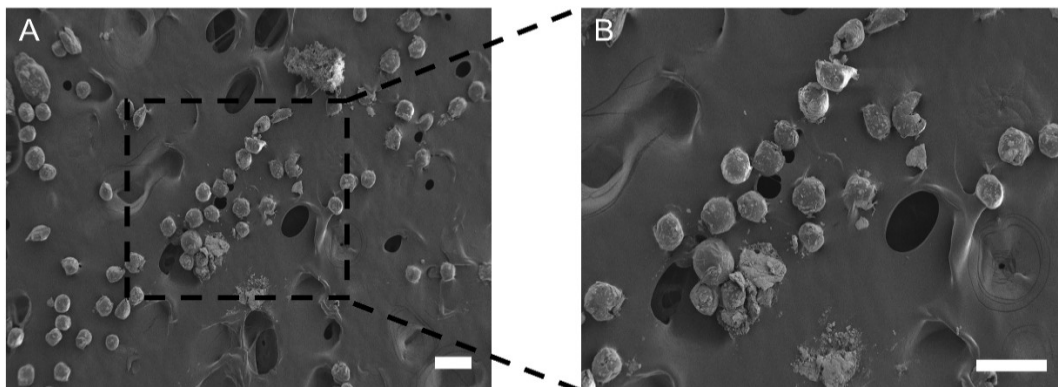

**Fig. S3** (A) SEM image of the  $\text{Bi}_2\text{S}_3@\text{SH-3}$  microspheres, scale bar: 200  $\mu\text{m}$ . (B) The high magnification image of (A), scale bar: 200  $\mu\text{m}$ .

**Table. S1** Composition of the Bi<sub>2</sub>S<sub>3</sub>@SH microspheres.

| <b>Samples</b>                       | <b>HA (g)</b> | <b>HCl (mL)</b> | <b>BDDE (μL)</b> | <b>Theoretical Bi<sub>2</sub>S<sub>3</sub> contents (g)</b> |
|--------------------------------------|---------------|-----------------|------------------|-------------------------------------------------------------|
| SH-0                                 | 0.4           | 19.6            | 50               | 0                                                           |
| Bi <sub>2</sub> S <sub>3</sub> @SH-1 | 0.4           | 19.6            | 50               | 0.07                                                        |
| Bi <sub>2</sub> S <sub>3</sub> @SH-2 | 0.4           | 19.6            | 50               | 0.17                                                        |
| Bi <sub>2</sub> S <sub>3</sub> @SH-3 | 0.4           | 19.6            | 50               | 0.4                                                         |
